# Supplementary material for: Surficial nanoporous carbon with high pyridinic/pyrrolic N-Doping from sp3/sp2-N-rich azaacene dye for lithium storage
Source: Royal Society of Chemistry journal article supplement (doi:10.1039/c7ra07850a), 2017-01-01
Supplement: c7ra07850a1.pdf [file c7ra07850a1.pdf]

## *Supporting Information*

# **Surficial Nanoporous Carbon with High Pyridinic/Pyrrolic N-Doping from $sp^3/sp^2$ -N-Rich Azaacene Dye for Lithium Storage**

Jianfeng Zhao,<sup>[a,c]</sup> Kai Chen,<sup>[a]</sup> Bing Yang,<sup>[a]</sup> Yanni Zhang,<sup>[a]</sup> Caixia Zhu,<sup>[a]</sup> Yinxiang Li,<sup>[b]</sup> Qichun Zhang,<sup>\*[b]</sup> Linghai Xie,<sup>\*[b]</sup> Wei Huang<sup>\*[a,c]</sup>

<sup>[a]</sup>Key Laboratory of Flexible Electronics (KLOFE) & Institute of Advanced Materials (IAM), Jiangsu National Synergetic Innovation Center for Advanced Materials (SICAM), Nanjing Tech University (NanjingTech), 30 South Puzhu Road, Nanjing 211816, P.R. China, E-mail: iamwhuang@njtech.edu.cn

<sup>[b]</sup>School of Materials Science and Engineering, Nanyang Technological University, 50 Nanyang Avenue, Singapore 639798, Singapore, E-mail: qc Zhang@ntu.edu.sg

<sup>[c]</sup>Key Laboratory for Organic Electronics and Information Displays & Institute of Advanced Materials (IAM), Jiangsu National Synergetic Innovation Center for Advanced Materials (SICAM) Key Laboratory for Organic Electronics & Information Displays (KLOEID) and Institute of Advanced Materials, Nanjing University of Posts & Telecommunications, Nanjing 210023 P. R. China, E-mail: iamlxie@njtech.edu.cn

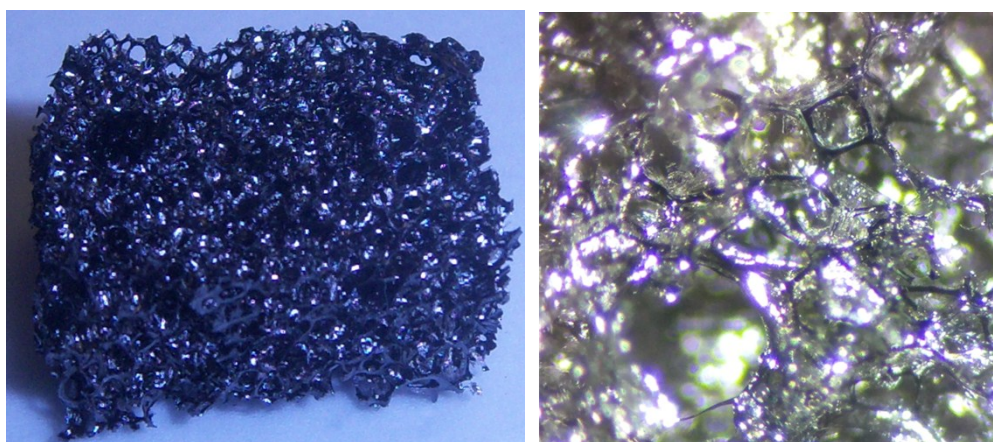

NC

**Figure S1.** The photograph of shining self-supported 3D carbon: NC.

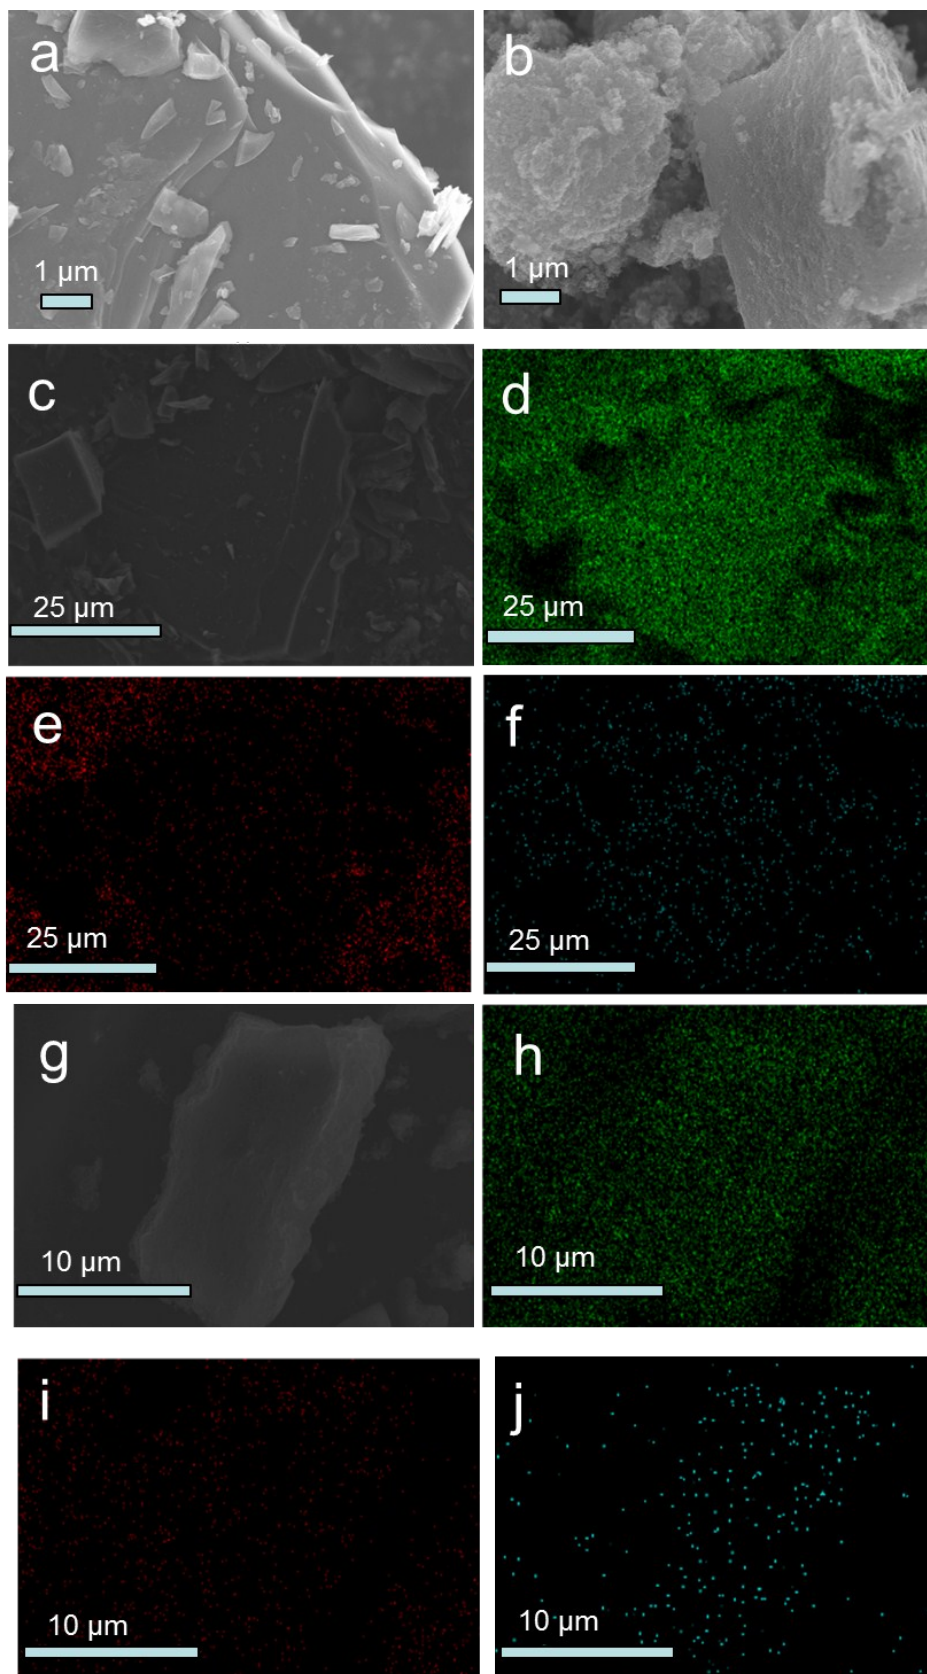

**Figure S2.** FE-SEM images of NC with smoothing surface (a) and NPC with etched surface (b); Carbon (d, h), oxygen (e, i), and nitrogen (f, j) mapping images of NC (d, e, f) and NPC (h, i, j) particles.

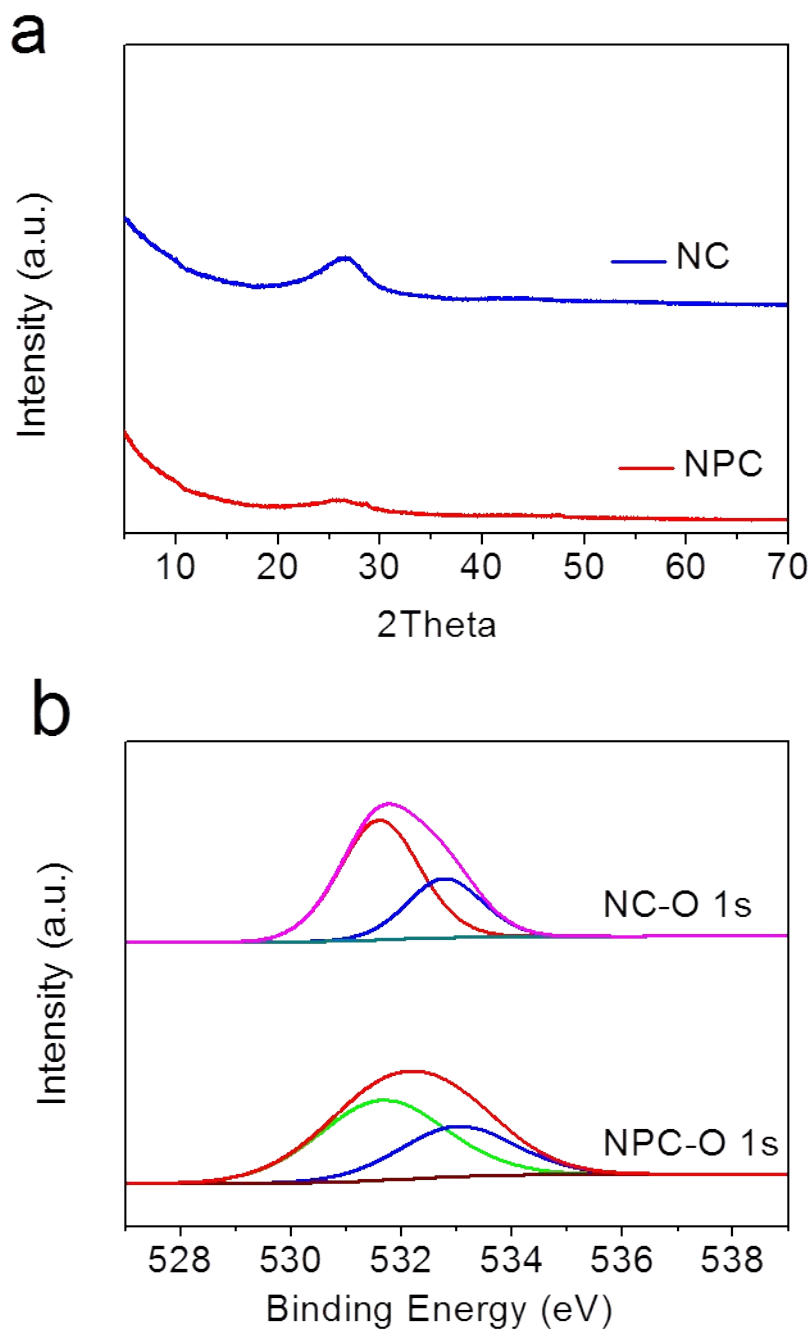

**Figure S3.** (a) Powder XRD patterns of **NC** and **NPC** made from  $\pi$ -conjugated azaacene dye at 700 °C; (b) The O 1s XPS spectrum with fitted curves of **NC** and **NPC**.

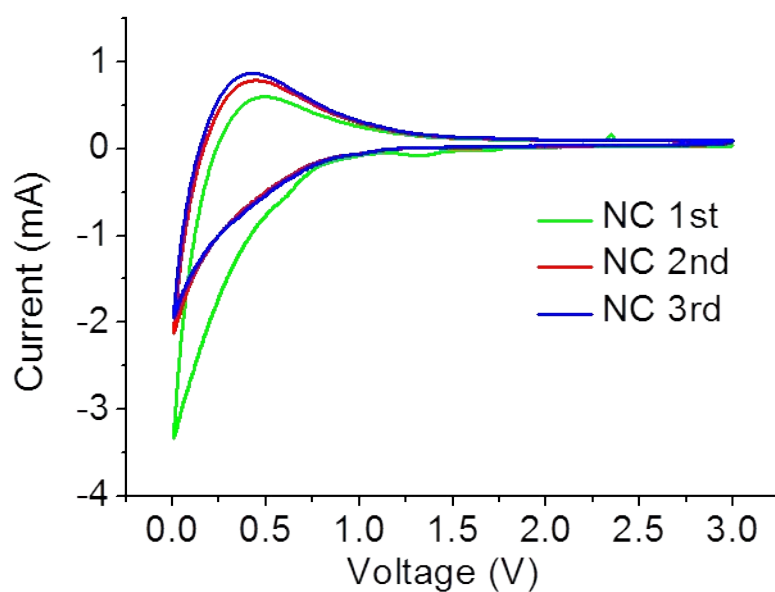

**Figure S4.** Electrochemical performance of NC electrode: The first, second, and third CV profiles at a scan rate of  $0.5 \text{ mVs}^{-1}$  over the potential window of 0.005–3 (vs Li/Li<sup>+</sup>).

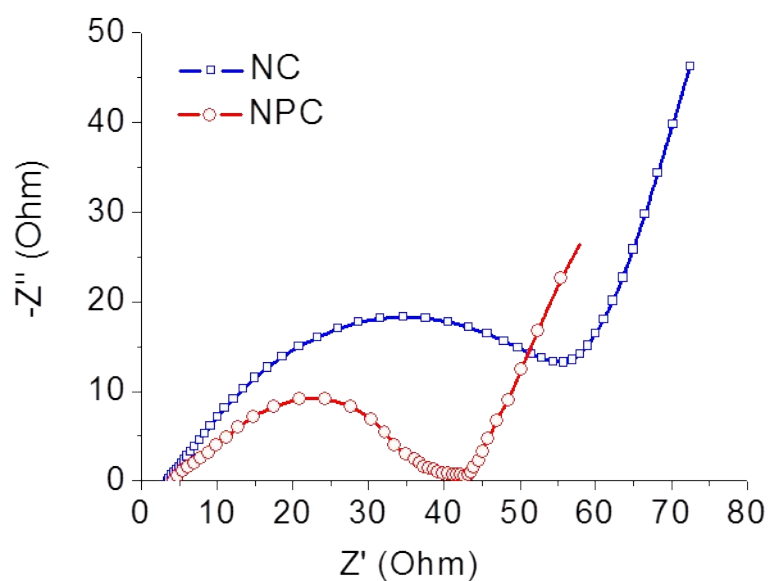

**Figure S5.** a) Electrochemical impedance spectroscopy of NC and NPC electrodes
